# Supplementary material for: Ten Simple Rules for Cultivating Open Science and Collaborative R&D
Source: PLOS journal article supplement (doi:10.1371/journal.pcbi.1003244), 2013-09-26
Supplement: S4 (10.1371/journal.pcbi.1003244.s004) [file journal.pcbi.1003244.s004]

301 Moved Permanently

# Moved Permanently

The document has moved here.

---

Apache Server at www.ploscompbiol.org Port 80
